# Supplementary material for: Effectiveness and Usability of Digital Tools to Support Dietary Self-Management of Gestational Diabetes Mellitus: A Systematic Review
Source: MDPI journal article supplement (doi:10.3390/nu14010010), 2021-12-21
Supplement: s1 [file s1]

## Appendix 1: Search strategy

| Database searched                                                                               | Search Terms                                                                                                                                                                                                                                                                                                                                                                                                                                                                                                                                                                                                                                                                                                                                                                                                                                                                                                                                                                                                                                                      |
|-------------------------------------------------------------------------------------------------|-------------------------------------------------------------------------------------------------------------------------------------------------------------------------------------------------------------------------------------------------------------------------------------------------------------------------------------------------------------------------------------------------------------------------------------------------------------------------------------------------------------------------------------------------------------------------------------------------------------------------------------------------------------------------------------------------------------------------------------------------------------------------------------------------------------------------------------------------------------------------------------------------------------------------------------------------------------------------------------------------------------------------------------------------------------------|
| <b>Embase, Cochrane Register of Controlled Trials (CENTRAL), Embase, CINAHL (via EBSCOhost)</b> | <p>(mobile application OR telehealth/ OR 'mobile phone' OR text messaging OR ('e-health' OR ehealth OR mhealth OR 'm-health' OR telehealth OR smartphone* OR ((mobile OR smart OR Android OR iOS) OR 'm-phone' OR mphone* OR 'cell phone' OR iphone OR ipad OR ipod OR ((app OR apps OR application*) OR portable OR tablet OR Android OR iOS OR web OR online)</p> <p><b>AND</b></p> <p>(Gestational diabetes mellitus OR GDM OR gestation* OR gestational diabetes OR diabetes, pregnancy induced OR diabetes mellitus, gestational OR pregnancy, OR pregnancy, hyperglycaemia OR pregnancy glycaemic index OR Pregnancy-Induced Diabetes OR Diabetes, Gestational) OR childbearing* OR maternal* OR maternity OR mother* OR antenatal* OR prenatal* OR perinatal)</p> <p><b>AND</b></p> <p>(diet* OR nutrition* OR food intake OR dietary intake OR food consumption OR calorie intake OR energy intake OR kilojoule intake OR calorie restriction OR diet* therapy OR vitamin OR nutrition* OR dietary intervention)</p> <p><b>NOT</b></p> <p>([Animals])</p> |
| <b>Medline (Web of Science), Scopus</b>                                                         | <p>(Mobile Application or Telemedicine or Cell Phones or ("e-health" or ehealth or mhealth or "m-health" OR telehealth) or smartphone* or ((mobile or smart or Android or iOS) ADJ3 (phone* or monitor* or device*)) or iphone or ipad or ((app or (apps or application*) or tablet or Android or iOS or web or online or communication))</p> <p><b>AND</b></p> <p>(Gestational diabetes mellitus or GDM or gestational diabetes or diabetes, pregnancy induced or diabetes mellitus or gestational or pregnancy, glucose intolerance or pregnancy, hyperglycaemia or pregnancy glycaemic index or Pregnancy-Induced Diabetes)</p> <p><b>AND</b></p> <p>(diet* or nutrition* or food intake or dietary intake or food consumption or calorie intake or energy intake or kilojoule intake or calorie restriction or diet* therapy or vitamin or nutrition)</p> <p><b>NOT</b></p> <p>(animal).</p>                                                                                                                                                                  |
